# Supplementary material for: Phylogeographic Analysis and Genetic Structure of an Endemic Sino-Japanese Disjunctive Genus Diabelia (Caprifoliaceae)
Source: Front Plant Sci. 2019 Jul 16;10:913. doi: 10.3389/fpls.2019.00913 (PMC6646888; doi:10.3389/fpls.2019.00913)
Supplement: Table S2 — Longitudinal and latitudinal information of Diabelia sampling sites. [file Table_2.XLSX]

## Sheet: psbA_trnH
samples	Population Number (Corresponding Table 1)	psbA-trnH	rpl32-trnL
AIC(1)-P	AIC	MK204141	MK119598
AIC(2)-P	AIC	MK204142	MK119599
AIC(3)-P	AIC	MK204143	MK119600
AIC(4)-P	AIC	MK204144	MK119601
AIC(5)-P	AIC	MK204145	MK119602
EHI1(1)-E	EHI1	MK203940	MK119291
EHI1(2)-E	EHI1	MK203941	MK119292
EHI1(3)-E	EHI1	MK203942	MK119293
EHI1(4)-E	EHI1	MK203943	MK119294
EHI1(5)-E	EHI1	MK203944	MK119295
EHI2(1)-P	EHI2	MK204021	MK119604
EHI2(2)-P	EHI2	MK204022	MK119605
EHI3(1)-E	EHI3	MK203989	MK119406
EHI3(2)-E	EHI3	MK203990	MK119407
EHI3(3)-E	EHI3	MK203991	MK119408
EHI3(4)-E	EHI3	MK203992	MK119409
EHI3(5)-E	EHI3	MK203993	MK119410
EHI3(7)-E	EHI3	MK203994	MK119411
EHI3(8)-E	EHI3	MK203995	MK119412
EHI3(9)-E	EHI3	MK203996	MK119413
EHI3(10)-E	EHI3	MK203997	MK119414
EHI3(11)-E	EHI3	MK203998	MK119415
EHI3(12)-E	EHI3	MK203999	MK119416
FUK1(1)-P	FUK1	MK204087	MK119570
FUK1(2)-P	FUK1	MK204088	MK119571
FUK1(5)-P	FUK1	MK204089	MK119572
FUK1(6)-P	FUK1	MK204090	MK119573
FUK1(7)-P	FUK1	MK204091	MK119574
FUK1(8)-P	FUK1	MK204092	MK119575
FUK1(9)-P	FUK1	MK204093	MK119576
FUK1(10)-P	FUK1	MK204094	MK119577
FUK1(11)-P	FUK1	MK204095	MK119578
FUK1(12)-P	FUK1	MK204096	MK119579
FUK1(13)-P	FUK1	MK204097	MK119580
FUK1(14)-P	FUK1	MK204098	MK119581
FUK1(15)-P	FUK1	MK204099	MK119582
FUK1(16)-P	FUK1	MK204100	MK119583
FUK1(17)-P	FUK1	MK204101	MK119584
FUK1(18)-P	FUK1	MK204102	MK119585
FUK1(19)-P	FUK1	MK204103	MK119586
FUK1(20)-P	FUK1	MK204104	MK119587
FUK1(21)-P	FUK1	MK204105	MK119588
FUK1(22)-P	FUK1	MK204106	MK119589
FUK1(23)-P	FUK1	MK204107	MK119590
FUK1(24)-P	FUK1	MK204108	MK119591
FUK1(25)-P	FUK1	MK204109	MK119592
FUK1(27)-P	FUK1	MK204110	MK119593
FUK1(28)-P	FUK1	MK204111	MK119594
FUK1(29)-P	FUK1	MK204112	MK119595
FUK1(30)-P	FUK1	MK204113	MK119596
FUK1(31)-P	FUK1	MK204114	MK119597
FUK2(1)-E	FUK2	MK203902	MK119318
FUK2(2)-E	FUK2	MK203903	MK119319
GIF1(1)-E	GIF1	MK203959	MK119323
GIF2(1)-P	GIF2	MK204118	MK119610
GYE(1)-P	GYE	MK204256	MK119642
GYE(2)-P	GYE	MK204257	MK119643
GYE(3)-P	GYE	MK204258	MK119644
GYE(7)-P	GYE	MK204259	MK119645
GYE(8)-P	GYE	MK204260	MK119646
GYE(9)-P	GYE	MK204261	MK119647
GYE(10)-P	GYE	MK204262	MK119648
HYO(2)-E	HYO	MK203939	MK119282
IBA(1)-P	IBA	MK204045	MK119521
IBA(2)-P	IBA	MK204046	MK119522
IBA(3)-P	IBA	MK204047	MK119523
IBA(4)-P	IBA	MK204048	MK119524
IBA(6)-P	IBA	MK204049	MK119525
IBA(7)-P	IBA	MK204050	MK119526
IBA(8)-P	IBA	MK204051	MK119527
IBA(9)-P	IBA	MK204052	MK119528
IBA(10)-P	IBA	MK204053	MK119529
IBA(11)-P	IBA	MK204054	MK119530
IBA(12)-P	IBA	MK204055	MK119531
IBA(14)-P	IBA	MK204056	MK119532
IBA(15)-P	IBA	MK204057	MK119533
IBA(16)-P	IBA	MK204058	MK119534
IBA(18)-P	IBA	MK204059	MK119535
IBA(19)-P	IBA	MK204060	MK119536
IBA(20)-P	IBA	MK204061	MK119537
IBA(21)-P	IBA	MK204062	MK119538
KAG1(1)-E	KAG1	MK203889	MK119276
KAG1(2)-E	KAG1	MK203890	MK119277
KAG1(3)-E	KAG1	MK203891	MK119278
KAG1(4)-E	KAG1	MK203892	MK119279
KAG1(5)-E	KAG1	MK204140	MK119280
KAG1(6)-E	KAG1	MK203893	MK119281
KAG2(2)-E	KAG2	MK203918	MK119359
KAG2(7)-E	KAG2	MK203919	MK119360
KAG2(8)-E	KAG2	MK203920	MK119361
KAG2(11)-E	KAG2	MK203921	MK119362
KAG2(14)-E	KAG2	MK203922	MK119363
KAG2(15)-E	KAG2	MK203923	MK119364
KAG2(16)-E	KAG2	MK203924	MK119365
KAG2(17)-E	KAG2	MK203925	MK119366
KAG2(18)-E	KAG2	MK203926	MK119367
KAG2(19)-E	KAG2	MK203927	MK119368
KAG2(20)-E	KAG2	MK203928	MK119369
KAG2(25)-E	KAG2	MK203929	MK119370
KAG2(26)-E	KAG2	MK204280	MK119371
KAG3(1)-E	KAG3	MK203885	MK119373
KAG3(7)-E	KAG3	MK203886	MK119374
KAG3(12)-E	KAG3	MK203887	MK119375
KAG3(13)-E	KAG3	MK203888	MK119376
KAN(1)-P	KAN	MK204135	MK119641
KOC1(1)-E	KOC1	MK203960	MK119377
KOC1(6)-E	KOC1	MK203961	MK119378
KOC1(7)-E	KOC1	MK203962	MK119379
KOC1(8)-E	KOC1	MK203963	MK119380
KOC1(9)-E	KOC1	MK203964	MK119381
KOC1(10)-E	KOC1	MK203965	MK119382
KOC1(11)-E	KOC1	MK203966	MK119383
KOC1(12)-E	KOC1	MK203967	MK119384
KOC1(13)-E	KOC1	MK203968	MK119385
KOC1(15)-E	KOC1	MK203969	MK119386
KOC1(16)-E	KOC1	MK203970	MK119387
KOC1(17)-E	KOC1	MK203971	MK119388
KOC1(18)-E	KOC1	MK203972	MK119389
KOC1(19)-E	KOC1	MK203973	MK119390
KOC1(20)-E	KOC1	MK203974	MK119391
KOC1(21)-E	KOC1	MK203975	MK119392
KOC2(1)-P	KOC2	MK204263	MK119649
KOC2(2)-P	KOC2	MK204264	MK119650
KOC3(1)-E	KOC3	MK203976	MK119393
KOC3(2)-E	KOC3	MK203977	MK119394
KOC3(4)-E	KOC3	MK203978	MK119395
KOC3(5)-E	KOC3	MK203979	MK119396
KOC3(7)-E	KOC3	MK203980	MK119397
KOC3(8)-E	KOC3	MK203981	MK119398
KOC3(9)-E	KOC3	MK203982	MK119399
KOC3(10)-E	KOC3	MK203983	MK119400
KOC3(12)-E	KOC3	MK203984	MK119401
KOC3(13)-E	KOC3	MK203985	MK119402
KOC3(14)-E	KOC3	MK203986	MK119403
KOC3(15)-E	KOC3	MK203987	MK119404
KOC3(16)-E	KOC3	MK203988	MK119405
MIE(01)-T	MIE	MK204023	MK119417
MIE(2)-T	MIE	MK204024	MK119418
MIE(3)-T	MIE	MK204146	MK119419
MIY1(2)-S	MIY1	MK204156	MK119440
MIY1(3)-S	MIY1	MK204157	MK119441
MIY1(5)-S	MIY1	MK204158	MK119442
MIY1(6)-S	MIY1	MK204159	MK119443
MIY1(7)-S	MIY1	MK204160	MK119444
MIY1(8)-S	MIY1	MK204161	MK119445
MIY1(9)-S	MIY1	MK204162	MK119446
MIY1(10)-S	MIY1	MK204163	MK119447
MIY1(11)-S	MIY1	MK204164	MK119448
MIY1(12)-S	MIY1	MK204165	MK119449
MIY1(12-2)-S	MIY1	MK204019	-
MIY1(13)-S	MIY1	MK204166	MK119450
MIY1(14)-S	MIY1	MK204167	MK119451
MIY1(15)-S	MIY1	MK204168	MK119452
MIY1(16)-S	MIY1	MK204169	MK119453
MIY1(17)-S	MIY1	MK204170	MK119454
MIY1(18)-S	MIY1	MK204171	MK119455
MIY1(19)-S	MIY1	MK204172	MK119456
MIY1(20)-S	MIY1	MK204173	MK119457
MIY1(21)-S	MIY1	MK204174	MK119458
MIY2(1)-S	MIY2	MK204198	MK119611
MIY2(2)-S	MIY2	MK204199	MK119612
MIY2(3)-S	MIY2	MK204200	MK119613
MIY2(4)-S	MIY2	MK204201	MK119614
MIY2(6)-S	MIY2	MK204202	MK119615
MIY2(7)-S	MIY2	MK204203	MK119616
MIY2(8)-S	MIY2	MK204204	MK119617
MIY2(9)-S	MIY2	MK204205	MK119618
MIY2(10)-S	MIY2	MK204206	MK119619
MIY2(11)-S	MIY2	MK204207	MK119620
MIY2(17)-S	MIY2	MK204208	MK119621
MIY2(18)-S	MIY2	MK204209	MK119622
MIY2(20)-S	MIY2	MK204210	MK119623
NAR(1)-P	NAR	MK204138	MK119603
OIT(12)-E	OIT	MK204266	MK119372
OKA(1)-E	OKA	MK203917	MK119358
SAI(1)-S	SAI	MK204063	MK119539
SAI(2)-S	SAI	MK204064	MK119540
SAI(3)-S	SAI	MK204065	MK119541
SAI(4)-S	SAI	MK204066	MK119542
SAI(5)-S	SAI	MK204067	MK119543
SAI(6)-S	SAI	MK204068	MK119544
SAI(7)-S	SAI	MK204069	MK119545
SAI(8)-S	SAI	MK204070	MK119546
SAI(9)-S	SAI	MK204071	MK119547
SAI(10)-S	SAI	MK204072	MK119548
SAI(11)-S	SAI	MK204073	MK119549
SAI(12)-S	SAI	MK204074	MK119550
SAI(13)-S	SAI	MK204075	MK119551
SAI(14)-S	SAI	MK204076	MK119552
SAI(15)-S	SAI	MK204077	MK119553
SAI(16)-S	SAI	MK204078	MK119554
SAI(17)-S	SAI	MK204079	MK119555
SAI(18)-S	SAI	MK204080	MK119556
SAI(19)-S	SAI	MK204081	MK119557
SAI(20)-S	SAI	MK204082	MK119558
SAI(22)-S	SAI	MK204083	MK119559
SAI(23)-S	SAI	MK204084	MK119560
SAI(24)-S	SAI	MK204085	MK119561
SAI(25)-S	SAI	MK204086	MK119562
SH1(1)-E	SH1	MK204269	MK119296
SH1(2)-E	SH1	MK203945	MK119297
SH1(3)-E	SH1	MK203946	MK119298
SH1(4)-E	SH1	MK203947	MK119299
SH1(5)-E	SH1	MK204270	MK119300
SH1(6)-E	SH1	MK204271	MK119301
SH1(7)-E	SH1	MK203948	MK119302
SH2(1)-P	SH2	MK204025	MK119420
SH2(2)-P	SH2	MK204026	MK119421
SH2(3)-P	SH2	MK204027	MK119422
SH2(4)-P	SH2	MK204028	MK119423
SH2(9)-P	SH2	MK204029	MK119424
SH2(10)-P	SH2	MK204030	MK119425
SH2(10-2)-P	SH2	MK204031	MK119426
SH2(11)-P	SH2	MK204032	MK119427
SH3(1)-E	SH3	MK204272	MK119303
SH3(2)-E	SH3	MK203949	MK119304
SH3(3)-E	SH3	MK204273	MK119305
SH3(4)-E	SH3	MK204274	MK119306
SH3(5)-E	SH3	MK204275	MK119307
SH4(1)-T	SH4	MK204033	MK119428
SH4(2)-T	SH4	MK204034	MK119429
SH4(3)-T	SH4	MK204035	MK119430
SH4(4)-T	SH4	MK204036	MK119431
SH5(1)-T	SH5	MK204037	MK119432
SH5(2)-T	SH5	MK204038	MK119433
SH5(3)-T	SH5	MK204039	MK119434
SH6(1)-P	SH6	MK204040	MK119435
SH6(2)-P	SH6	MK204041	MK119436
SH6(4)-P	SH6	MK204000	MK119437
SH6(5)-P	SH6	MK204042	MK119438
SH6(6)-P	SH6	MK204043	MK119439
SH7(1)-E	SH7	MK203950	MK119308
SH7(2)-E	SH7	MK203951	MK119309
SHA1(1)-E	SHA1	MK203952	MK119310
SHA1(3)-E	SHA1	MK204276	MK119311
SHA1(5)-E	SHA1	MK203953	MK119312
SHA1(6)-E	SHA1	MK203954	MK119313
SHA1(7)-E	SHA1	MK203955	MK119314
SHA1(10)-E	SHA1	MK203956	MK119315
SHA1(11)-E	SHA1	MK204277	MK119316
SHA1(13)-E	SHA1	MK204278	MK119317
SHA2(1)-P	SHA2	MK204136	MK119651
SHA2(2)-P	SHA2	MK204137	MK119652
SHI(2)-E	SHI	MK203894	MK119283
SHI(3)-E	SHI	MK203895	MK119284
SHI(5)-E	SHI	MK203896	MK119285
SHI(6)-E	SHI	MK203897	MK119286
SHI(7)-E	SHI	MK203898	MK119287
SHI(8)-E	SHI	MK203899	MK119288
SHI(9)-E	SHI	MK203900	MK119289
SHI(10)-E	SHI	MK203901	MK119290
SHI1(1)-S	SHI1	MK204119	MK119624
SHI1(2)-S	SHI1	MK204120	MK119625
SHI1(3)-S	SHI1	MK204121	MK119626
SHI1(5)-S	SHI1	MK204122	MK119627
SHI1(6)-S	SHI1	MK204123	MK119628
SHI1(7)-S	SHI1	MK204124	MK119629
SHI2(1)-P	SHI2	MK204265	MK119630
SHI2(2)-P	SHI2	MK204125	MK119631
SHI2(3)-P	SHI2	MK204126	MK119632
SHI2(4)-P	SHI2	MK204127	MK119633
SHI2(5)-P	SHI2	MK204128	MK119634
SHI2(6)-P	SHI2	MK204129	MK119635
SHI2(7)-P	SHI2	MK204130	MK119636
SHI2(8)-P	SHI2	MK204131	MK119637
SHI2(9)-P	SHI2	MK204132	MK119638
SHI2(10)-P	SHI2	MK204133	MK119639
SHI2(11)-P	SHI2	MK204134	MK119640
TOC(1)-S	TOC	MK204176	MK119498
TOC(2)-S	TOC	MK204177	MK119499
TOC(3)-S	TOC	MK204178	MK119500
TOC(4)-S	TOC	MK204179	MK119501
TOC(5)-S	TOC	MK204180	MK119502
TOC(6)-S	TOC	MK204181	MK119503
TOC(7)-S	TOC	MK204182	MK119504
TOC(8)-S	TOC	MK204183	MK119505
TOC(9)-S	TOC	MK204184	MK119506
TOC(10)-S	TOC	MK204185	MK119507
TOC(11)-S	TOC	MK204186	MK119508
TOC(12)-S	TOC	MK204187	MK119509
TOC(13)-S	TOC	MK204188	MK119510
TOC(14)-S	TOC	MK204044	MK119511
TOC(15)-S	TOC	MK204189	MK119512
TOC(16)-S	TOC	MK204190	MK119513
TOC(17)-S	TOC	MK204191	MK119514
TOC(18)-S	TOC	MK204192	MK119515
TOC(19)-S	TOC	MK204193	MK119516
TOC(20)-S	TOC	MK204194	MK119517
TOC(21)-S	TOC	MK204195	MK119518
TOC(22)-S	TOC	MK204196	MK119519
TOC(23)-S	TOC	MK204197	MK119520
TOK1(1)-P	TOK1	MK204139	MK119606
TOK1(2)-P	TOK1	MK204115	MK119607
TOK1(3)-P	TOK1	MK204116	MK119608
TOK2(1)-P	TOK2	MK204117	MK119609
TOK3(1)-T	TOK3	MK203930	MK119653
TOK3(2)-T	TOK3	MK203931	MK119654
TOK3(3)-T	TOK3	MK203932	MK119655
TOK3(4)-T	TOK3	MK203933	MK119656
TOK3(5)-T	TOK3	MK203934	MK119657
TOK3(6)-T	TOK3	MK203935	MK119658
TOK3(7)-T	TOK3	MK203936	MK119659
TOK3(8)-T	TOK3	MK203937	MK119660
TOK3(9)-T	TOK3	MK203938	MK119661
TOK4(1)-E	TOK4	MK203957	MK119320
TOK4(2)-E	TOK4	MK203958	MK119321
TOK4(3)-E	TOK4	MK204001	MK119322
TOK5(2)-E	TOK5	MK204002	MK119324
TOK5(3)-E	TOK5	MK204003	MK119325
TOK5(4)-E	TOK5	MK204004	MK119326
TOK5(5)-E	TOK5	MK204005	MK119327
TOK5(6)-E	TOK5	MK204006	MK119328
TOK5(9)-E	TOK5	MK204279	MK119329
TOK5(11)-E	TOK5	MK204007	MK119330
TOK5(12)-E	TOK5	MK204008	MK119331
TOK5(13)-E	TOK5	MK204009	MK119332
TOK5(14)-E	TOK5	MK204010	MK119333
TOK5(15)-E	TOK5	MK204011	MK119334
TOK5(16)-E	TOK5	MK204267	MK119335
TOK5(17)-E	TOK5	MK204012	MK119336
TOK5(18)-E	TOK5	-	MK119337
TOK5(19)-E	TOK5	MK204268	MK119338
TOK6(1)-E	TOK6	MK203904	MK119339
TOK6(2)-E	TOK6	MK203905	MK119340
TOK6(3)-E	TOK6	MK204013	MK119341
TOK6(4)-E	TOK6	MK203906	MK119342
TOK6(9)-E	TOK6	MK203907	MK119343
TOK6(10)-E	TOK6	MK203908	MK119344
TOK6(11)-E	TOK6	MK203909	MK119345
TOK6(12)-E	TOK6	MK203910	MK119346
TOK6(13)-E	TOK6	MK203911	MK119347
TOK6(14)-E	TOK6	MK203912	MK119348
TOK6(15)-E	TOK6	MK203913	MK119349
TOK6(16)-E	TOK6	MK203914	MK119350
TOK6(18)-E	TOK6	MK203915	MK119351
TOK6(19)-E	TOK6	MK204014	MK119352
TOK6(20)-E	TOK6	MK204015	MK119353
TOK6(21)-E	TOK6	MK204016	MK119354
TOK6(22)-E	TOK6	MK203916	MK119355
TOK6(23)-E	TOK6	MK204017	MK119356
TOK6(24)-E	TOK6	MK204018	MK119357
TOY(1)-P	TOY	MK204212	MK119563
TOY(2)-P	TOY	-	MK119564
TOY(3)-P	TOY	MK204213	MK119565
TOY(4)-P	TOY	MK204255	MK119566
TOY(5)-P	TOY	MK204214	MK119567
TOY(6)-P	TOY	MK204215	MK119568
TOY(7)-P	TOY	MK204216	MK119569
WEN2(1)-E	WEN2	MK203880	MK119261
WEN2(3)-E	WEN2	MK203881	MK119262
WEN2(4)-E	WEN2	MK203882	MK119263
WEN2(5)-E	WEN2	MK203883	MK119264
WEN2(6)-E	WEN2	MK203884	MK119265
WEN4(2)-T	WEN4	MK204147	MK119266
WEN4(3)-T	WEN4	MK204148	MK119267
WEN4(4)-T	WEN4	MK204020	MK119268
WEN5(1)-T	WEN5	MK204150	MK119269
WEN5(2)-T	WEN5	MK204151	MK119270
WEN5(3)-T	WEN5	MK204152	MK119271
WEN5(4)-T	WEN5	MK204153	MK119272
WEN5(17)-T	WEN5	MK204154	MK119273
WEN5(18)-T	WEN5	MK204155	MK119274
WEN5(19)-T	WEN5	MK204149	MK119275
YAM1(1)-T	YAM1	MK204217	MK119459
YAM1(2)-T	YAM1	MK204218	MK119460
YAM1(3)-T	YAM1	MK204219	MK119461
YAM1(4)-T	YAM1	MK204220	MK119462
YAM1(5)-T	YAM1	MK204221	MK119463
YAM1(6)-T	YAM1	MK204222	MK119464
YAM1(7)-T	YAM1	MK204223	MK119465
YAM1(8)-T	YAM1	MK204224	MK119466
YAM1(9)-T	YAM1	MK204225	MK119467
YAM1(10)-T	YAM1	MK204226	MK119468
YAM1(11)-T	YAM1	MK204227	MK119469
YAM1(12)-T	YAM1	MK204228	MK119470
YAM1(13)-T	YAM1	MK204229	MK119471
YAM1(14)-T	YAM1	MK204230	MK119472
YAM1(15)-T	YAM1	MK204231	MK119473
YAM1(16)-T	YAM1	MK204232	MK119474
YAM1(17)-T	YAM1	MK204233	MK119475
YAM1(18)-T	YAM1	MK204234	MK119476
YAM1(19)-T	YAM1	MK204235	MK119477
YAM1(20)-T	YAM1	MK204236	MK119478
YAM1(21)-T	YAM1	MK204237	MK119479
YAM1(22)-T	YAM1	MK204238	MK119480
YAM1(23)-T	YAM1	MK204175	MK119481
YAM1(24)-T	YAM1	MK204239	MK119482
YAM2(1)-T	YAM2	MK204240	MK119483
YAM2(2)-T	YAM2	MK204241	MK119484
YAM2(4)-T	YAM2	MK204242	MK119485
YAM2(5)-T	YAM2	MK204243	MK119486
YAM2(6)-T	YAM2	MK204244	MK119487
YAM2(7)-T	YAM2	MK204245	MK119488
YAM2(8)-T	YAM2	MK204246	MK119489
YAM2(9)-T	YAM2	MK204247	MK119490
YAM2(11)-T	YAM2	MK204248	MK119491
YAM2(12)-T	YAM2	MK204249	MK119492
YAM2(13)-T	YAM2	MK204250	MK119493
YAM2(14)-T	YAM2	MK204251	MK119494
YAM2(14-2)-T	YAM2	MK204211	-
YAM2(15)-T	YAM2	MK204252	MK119495
YAM2(16)-T	YAM2	MK204253	MK119496
YAM2(17)-T	YAM2	MK204254	MK119497

## Sheet: rpl32-trnL
EHI1_e0401	MK119291
EHI1_e0402	MK119292
EHI1_e0403	MK119293
EHI1_e0404	MK119294
EHI1_e0405	MK119295
EHI2_p2801	MK119604
EHI2_p2802	MK119605
EHI3_e5201	MK119406
EHI3_e5202	MK119407
EHI3_e5203	MK119408
EHI3_e5204	MK119409
EHI3_e5205	MK119410
EHI3_e5207	MK119411
EHI3_e5208	MK119412
EHI3_e5209	MK119413
EHI3_e5210	MK119414
EHI3_e5211	MK119415
EHI3_e5212	MK119416
FUK1_p2501	MK119570
FUK1_p2502	MK119571
FUK1_p2505	MK119572
FUK1_p2506	MK119573
FUK1_p2507	MK119574
FUK1_p2508	MK119575
FUK1_p2509	MK119576
FUK1_p2510	MK119577
FUK1_p2511	MK119578
FUK1_p2512	MK119579
FUK1_p2513	MK119580
FUK1_p2514	MK119581
FUK1_p2515	MK119582
FUK1_p2516	MK119583
FUK1_p2517	MK119584
FUK1_p2518	MK119585
FUK1_p2519	MK119586
FUK1_p2520	MK119587
FUK1_p2521	MK119588
FUK1_p2522	MK119589
FUK1_p2523	MK119590
FUK1_p2524	MK119591
FUK1_p2525	MK119592
FUK1_p2527	MK119593
FUK1_p2528	MK119594
FUK1_p2529	MK119595
FUK1_p2530	MK119596
FUK1_p2531	MK119597
FUK2_e2901	MK119318
FUK2_e2902	MK119319
GIF1_e3401	MK119323
GIF2_p3501	MK119610
GYE_p5601	MK119642
GYE_p5602	MK119643
GYE_p5603	MK119644
GYE_p5607	MK119645
GYE_p5608	MK119646
GYE_p5609	MK119647
GYE_p5610	MK119648
HYO_e0202	MK119282
IBA_p2201	MK119521
IBA_p2202	MK119522
IBA_p2203	MK119523
IBA_p2204	MK119524
IBA_p2206	MK119525
IBA_p2207	MK119526
IBA_p2208	MK119527
IBA_p2209	MK119528
IBA_p2210	MK119529
IBA_p2211	MK119530
IBA_p2212	MK119531
IBA_p2214	MK119532
IBA_p2215	MK119533
IBA_p2216	MK119534
IBA_p2218	MK119535
IBA_p2219	MK119536
IBA_p2220	MK119537
IBA_p2221	MK119538
KAG1_e0101	MK119276
KAG1_e0102	MK119277
KAG1_e0103	MK119278
KAG1_e0104	MK119279
KAG1_e0105	MK119280
KAG1_e0106	MK119281
KAG2_e4202	MK119359
KAG2_e4207	MK119360
KAG2_e4208	MK119361
KAG2_e4211	MK119362
KAG2_e4214	MK119363
KAG2_e4215	MK119364
KAG2_e4216	MK119365
KAG2_e4217	MK119366
KAG2_e4218	MK119367
KAG2_e4219	MK119368
KAG2_e4220	MK119369
KAG2_e4225	MK119370
KAG2_e4226	MK119371
KAG3_e4801	MK119373
KAG3_e4807	MK119374
KAG3_e4812	MK119375
KAG3_e4813	MK119376
KAN_p5401	MK119641
KOC1_e5001	MK119377
KOC1_e5006	MK119378
KOC1_e5007	MK119379
KOC1_e5008	MK119380
KOC1_e5009	MK119381
KOC1_e5010	MK119382
KOC1_e5011	MK119383
KOC1_e5012	MK119384
KOC1_e5013	MK119385
KOC1_e5015	MK119386
KOC1_e5016	MK119387
KOC1_e5017	MK119388
KOC1_e5018	MK119389
KOC1_e5019	MK119390
KOC1_e5020	MK119391
KOC1_e5021	MK119392
KOC2_p6101	MK119649
KOC2_p6102	MK119650
KOC3_e5101	MK119393
KOC3_e5102	MK119394
KOC3_e5104	MK119395
KOC3_e5105	MK119396
KOC3_e5107	MK119397
KOC3_e5108	MK119398
KOC3_e5109	MK119399
KOC3_e5110	MK119400
KOC3_e5112	MK119401
KOC3_e5113	MK119402
KOC3_e5114	MK119403
KOC3_e5115	MK119404
KOC3_e5116	MK119405
MIE_p0501	MK119417
MIE_p0502	MK119418
MIE_p0503	MK119419
MIY1_p1802	MK119440
MIY1_p1803	MK119441
MIY1_p1805	MK119442
MIY1_p1806	MK119443
MIY1_p1807	MK119444
MIY1_p1808	MK119445
MIY1_p1809	MK119446
MIY1_p1810	MK119447
MIY1_p1811	MK119448
MIY1_p1812	MK119449
MIY1_p1813	MK119450
MIY1_p1814	MK119451
MIY1_p1815	MK119452
MIY1_p1816	MK119453
MIY1_p1817	MK119454
MIY1_p1818	MK119455
MIY1_p1819	MK119456
MIY1_p1820	MK119457
MIY1_p1821	MK119458
MIY2_p4001	MK119611
MIY2_p4002	MK119612
MIY2_p4003	MK119613
MIY2_p4004	MK119614
MIY2_p4006	MK119615
MIY2_p4007	MK119616
MIY2_p4008	MK119617
MIY2_p4009	MK119618
MIY2_p4010	MK119619
MIY2_p4011	MK119620
MIY2_p4017	MK119621
MIY2_p4018	MK119622
MIY2_p4020	MK119623
NAR_p2701	MK119603
OIT_e4312	MK119372
OKA_e3901	MK119358
SAI_p2301	MK119539
SAI_p2302	MK119540
SAI_p2303	MK119541
SAI_p2304	MK119542
SAI_p2305	MK119543
SAI_p2306	MK119544
SAI_p2307	MK119545
SAI_p2308	MK119546
SAI_p2309	MK119547
SAI_p2310	MK119548
SAI_p2311	MK119549
SAI_p2312	MK119550
SAI_p2313	MK119551
SAI_p2314	MK119552
SAI_p2315	MK119553
SAI_p2316	MK119554
SAI_p2317	MK119555
SAI_p2318	MK119556
SAI_p2319	MK119557
SAI_p2320	MK119558
SAI_p2322	MK119559
SAI_p2323	MK119560
SAI_p2324	MK119561
SAI_p2325	MK119562
SH1_e0601	MK119296
SH1_e0602	MK119297
SH1_e0603	MK119298
SH1_e0604	MK119299
SH1_e0605	MK119300
SH1_e0606	MK119301
SH1_e0607	MK119302
SH2_p0701	MK119420
SH2_p0702	MK119421
SH2_p0703	MK119422
SH2_p0704	MK119423
SH2_p0709	MK119424
SH2_p0710	MK119425
SH2_p0710(2)	MK119426
SH2_p0711	MK119427
SH3_e0801	MK119303
SH3_e0802	MK119304
SH3_e0803	MK119305
SH3_e0804	MK119306
SH3_e0805	MK119307
SH4_p0901	MK119428
SH4_p0902	MK119429
SH4_p0903	MK119430
SH4_p0904	MK119431
SH5_p1001	MK119432
SH5_p1002	MK119433
SH5_p1003	MK119434
SH6_p1101	MK119435
SH6_p1102	MK119436
SH6_p1104	MK119437
SH6_p1105	MK119438
SH6_p1106	MK119439
SH7_e1201	MK119308
SH7_e1202	MK119309
SHA1_e1301	MK119310
SHA1_e1303	MK119311
SHA1_e1305	MK119312
SHA1_e1306	MK119313
SHA1_e1307	MK119314
SHA1_e1310	MK119315
SHA1_e1311	MK119316
SHA1_e1313	MK119317
SHA2_p6201	MK119651
SHA2_p6202	MK119652
SHI_e0302	MK119283
SHI_e0303	MK119284
SHI_e0305	MK119285
SHI_e0306	MK119286
SHI_e0307	MK119287
SHI_e0308	MK119288
SHI_e0309	MK119289
SHI_e0310	MK119290
SHI1_p4101	MK119624
SHI1_p4102	MK119625
SHI1_p4103	MK119626
SHI1_p4105	MK119627
SHI1_p4106	MK119628
SHI1_p4107	MK119629
SHI2_p4701	MK119630
SHI2_p4702	MK119631
SHI2_p4703	MK119632
SHI2_p4704	MK119633
SHI2_p4705	MK119634
SHI2_p4706	MK119635
SHI2_p4707	MK119636
SHI2_p4708	MK119637
SHI2_p4709	MK119638
SHI2_p4710	MK119639
SHI2_p4711	MK119640
TOC_p2101	MK119498
TOC_p2102	MK119499
TOC_p2103	MK119500
TOC_p2104	MK119501
TOC_p2105	MK119502
TOC_p2106	MK119503
TOC_p2107	MK119504
TOC_p2108	MK119505
TOC_p2109	MK119506
TOC_p2110	MK119507
TOC_p2111	MK119508
TOC_p2112	MK119509
TOC_p2113	MK119510
TOC_p2114	MK119511
TOC_p2115	MK119512
TOC_p2116	MK119513
TOC_p2117	MK119514
TOC_p2118	MK119515
TOC_p2119	MK119516
TOC_p2120	MK119517
TOC_p2121	MK119518
TOC_p2122	MK119519
TOC_p2123	MK119520
TOK1_p3001	MK119606
TOK1_p3002	MK119607
TOK1_p3003	MK119608
TOK2_p3101	MK119609
TOK3_t3201	MK119653
TOK3_t3202	MK119654
TOK3_t3203	MK119655
TOK3_t3204	MK119656
TOK3_t3205	MK119657
TOK3_t3206	MK119658
TOK3_t3207	MK119659
TOK3_t3208	MK119660
TOK3_t3209	MK119661
TOK4_e3301	MK119320
TOK4_e3302	MK119321
TOK4_e3303	MK119322
TOK5_e3602	MK119324
TOK5_e3603	MK119325
TOK5_e3604	MK119326
TOK5_e3605	MK119327
TOK5_e3606	MK119328
TOK5_e3609	MK119329
TOK5_e3611	MK119330
TOK5_e3612	MK119331
TOK5_e3613	MK119332
TOK5_e3614	MK119333
TOK5_e3615	MK119334
TOK5_e3616	MK119335
TOK5_e3617	MK119336
TOK5_e3618	MK119337
TOK5_e3619	MK119338
TOK6_e3701	MK119339
TOK6_e3702	MK119340
TOK6_e3703	MK119341
TOK6_e3704	MK119342
TOK6_e3709	MK119343
TOK6_e3710	MK119344
TOK6_e3711	MK119345
TOK6_e3712	MK119346
TOK6_e3713	MK119347
TOK6_e3714	MK119348
TOK6_e3715	MK119349
TOK6_e3716	MK119350
TOK6_e3718	MK119351
TOK6_e3719	MK119352
TOK6_e3720	MK119353
TOK6_e3721	MK119354
TOK6_e3722	MK119355
TOK6_e3723	MK119356
TOK6_e3724	MK119357
TOY_p2401	MK119563
TOY_p2402	MK119564
TOY_p2403	MK119565
TOY_p2404	MK119566
TOY_p2405	MK119567
TOY_p2406	MK119568
TOY_p2407	MK119569
WEN2_ce1501	MK119261
WEN2_ce1503	MK119262
WEN2_ce1504	MK119263
WEN2_ce1505	MK119264
WEN2_ce1506	MK119265
WEN4_cp1702	MK119266
WEN4_cp1703	MK119267
WEN4_cp1704	MK119268
WEN5_cp5701	MK119269
WEN5_cp5702	MK119270
WEN5_cp5703	MK119271
WEN5_cp5704	MK119272
WEN5_cp5717	MK119273
WEN5_cp5718	MK119274
WEN5_cp5719	MK119275
YAM1_p1901	MK119459
YAM1_p1902	MK119460
YAM1_p1903	MK119461
YAM1_p1904	MK119462
YAM1_p1905	MK119463
YAM1_p1906	MK119464
YAM1_p1907	MK119465
YAM1_p1908	MK119466
YAM1_p1909	MK119467
YAM1_p1910	MK119468
YAM1_p1911	MK119469
YAM1_p1912	MK119470
YAM1_p1913	MK119471
YAM1_p1914	MK119472
YAM1_p1915	MK119473
YAM1_p1916	MK119474
YAM1_p1917	MK119475
YAM1_p1918	MK119476
YAM1_p1919	MK119477
YAM1_p1920	MK119478
YAM1_p1921	MK119479
YAM1_p1922	MK119480
YAM1_p1923	MK119481
YAM1_p1924	MK119482
YAM2_p2001	MK119483
YAM2_p2002	MK119484
YAM2_p2004	MK119485
YAM2_p2005	MK119486
YAM2_p2006	MK119487
YAM2_p2007	MK119488
YAM2_p2008	MK119489
YAM2_p2009	MK119490
YAM2_p2011	MK119491
YAM2_p2012	MK119492
YAM2_p2013	MK119493
YAM2_p2014	MK119494
YAM2_p2015	MK119495
YAM2_p2016	MK119496
YAM2_p2017	MK119497

## Sheet: Sheet3
-
